# Supplementary material for: Strong modulation of electronic properties of monolayer MoTe2 using a ferroelectric LiNbO3(0001) substrate
Source: Royal Society of Chemistry journal article supplement (doi:10.1039/d1tc03108b), 2021-01-01
Supplement: d1tc03108b1.pdf [file d1tc03108b1.pdf]

# Supporting Information for

## Strong Modulation of Electronic Properties in Monolayer MoTe<sub>2</sub> Using a Ferroelectric LiNbO<sub>3</sub>(0001) Substrate

Cheng Ke, Jian-Qing Dai,\* and Jin Yuan

Faculty of Materials Science and Engineering, Kunming University of Science and  
Technology, Kunming 650093, P. R. China

\*Corresponding author. Fax: +86 871 65107922.

E-mail address: djqkust@sina.com (J.-Q. Dai).

ORCID: 0000-0003-4352-0789 (Jian-Qing Dai)

Table S1 Total energy (eV) of five stacking configurations of MoTe<sub>2</sub>/LNO(0001).  
Stacks Nos. 1-5 represent the configurations of different relative displacements of  
MoTe<sub>2</sub> monolayer relative to LNO, which are (0, 0), (1/4, 0), (1/4, 1/4), (1/2, 0), and  
(1/2, 1/2).

| Stacks | No. 1     | No. 2     | No. 3     | No. 4     | No. 5     |
|--------|-----------|-----------|-----------|-----------|-----------|
| LNO Z- | -1232.907 | -1232.917 | -1232.918 | -1232.916 | -1232.918 |
| LNO Z+ | -1375.683 | -1375.700 | -1375.700 | -1375.683 | -1375.683 |

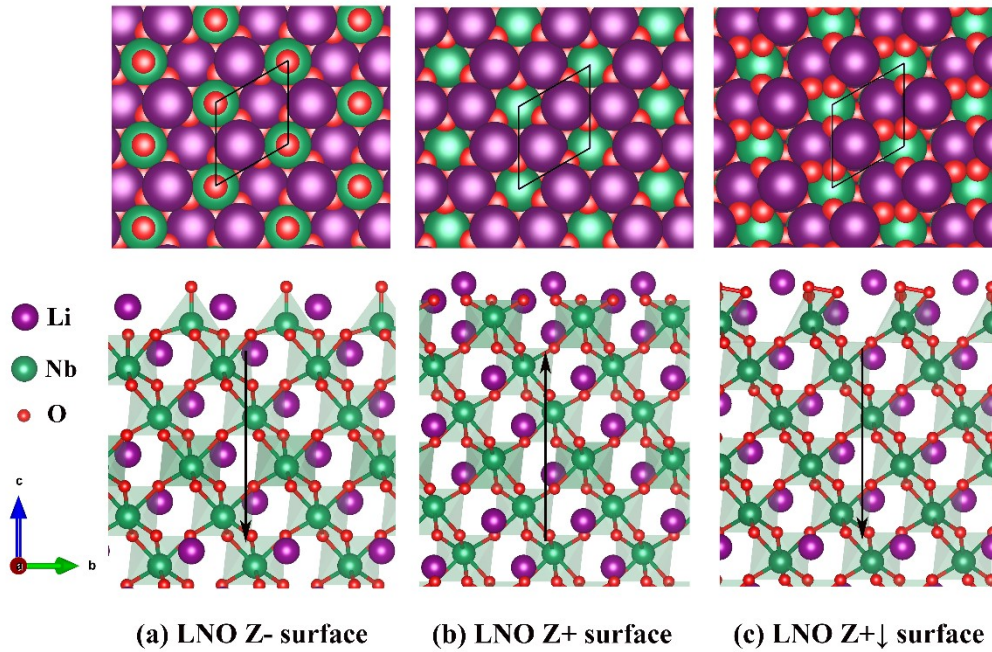

Fig. S1 Surface slab model of ferroelectric LNO(0001) stabilized (a) negative and (b) positive surface and (c) the polarization-reversed LNO Z+ surface. The upper layer is space-filling models, and the lower layer is side view. The black arrow represents the direction of ferroelectric polarization. The thermodynamic preferred surface terminations of LNO Z- and Z+ are -Li-O terminated and -Nb-O<sub>3</sub>-Li<sub>2</sub> terminated, which are consistent with the surface terminations described in references 1 and 2. On the other hand, the LNO slabs uses six Nb-O<sub>3</sub>-Li trilayers plus surface termination, fixes the lowest three atomic layers and optimizes only the outermost three Nb-O<sub>3</sub>-Li trilayers plus stable surface termination.

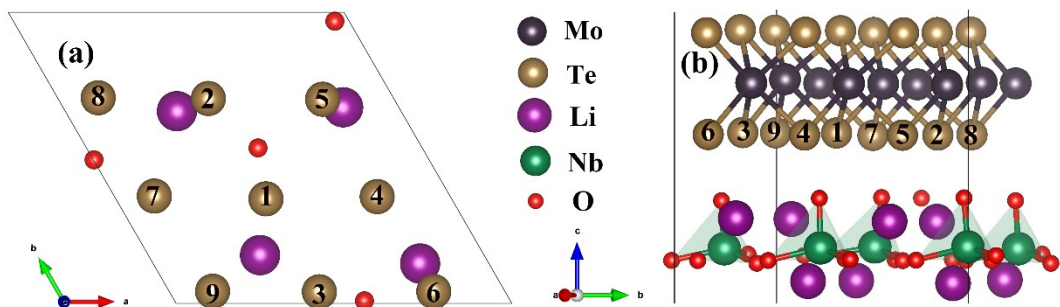

Fig. S2 To inspect the local chemical environment between the MoTe<sub>2</sub> monolayer and the LNO Z- surface, we draw the local atomic structure diagram. (a) Is the top view (-Li-O surface termination plus the lowest Mo atom layer in MoTe<sub>2</sub>). (b) Is a side view with the c-axis of 0.38-0.62 in fractional coordinates. Note that Te atoms are labeled with numbers 1-9.

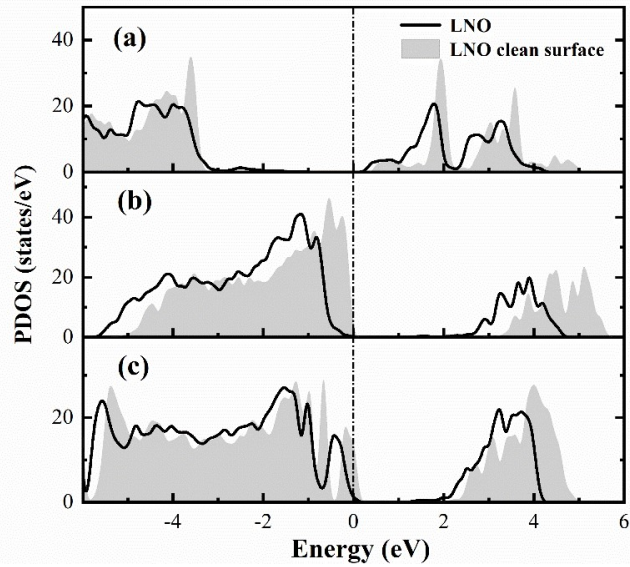

Fig. S3 Projected DOS on the LNO surface (one Nb–O<sub>3</sub>–Li trilayer plus the surface termination) for MoTe<sub>2</sub>/LNO(0001) heterogeneous systems. (a), (b) and (c) are MoTe<sub>2</sub>/LNO Z-, MoTe<sub>2</sub>/LNO Z+, and MoTe<sub>2</sub>/LNO Z+↓ systems, respectively. The gray shaded area is the DOS of the corresponding LNO(0001) clean surface. The Fermi level is set to 0 eV.

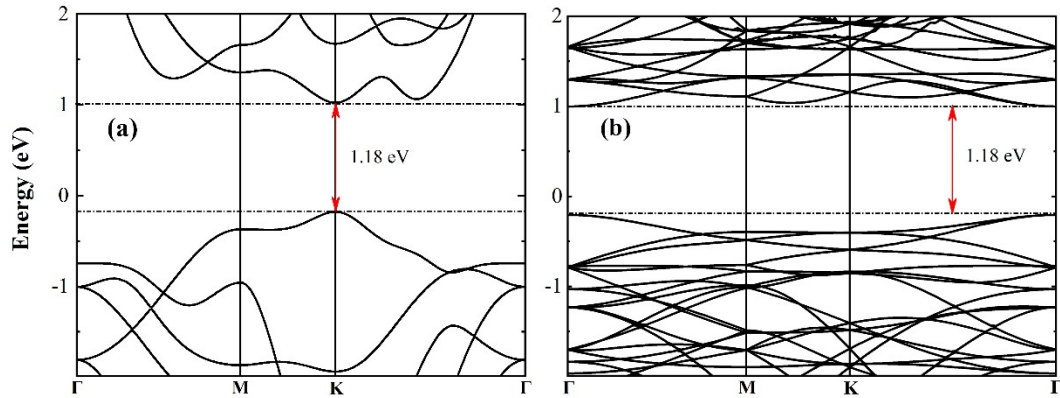

Fig. S4 Band structure for (a) the primitive cell and (b)  $3 \times 3$  supercell of MoTe<sub>2</sub> monolayer. The red arrow indicates the optimal transition route of electrons, i.e., the k-point position corresponding to the conduction band minimum (CBM) and the valence band maximum (VBM). And the Fermi level is set to 0 eV.

---

1 S. Sanna and W. G. Schmidt, Lithium niobate X-cut, Y-cut, and Z-cut surfaces from ab initio theory, Phys. Rev. B 81 (2010) 214116.

2 S.V. Levchenko, A.M. Rappe, Influence of ferroelectric polarization on the equilibrium stoichiometry of Lithium Niobate (0001) surfaces, Phys. Rev. Lett. 100 (2008) 256101.
